# Supplementary material
Source: PubMed Central journal article supplement (PMC2151701)

**A**

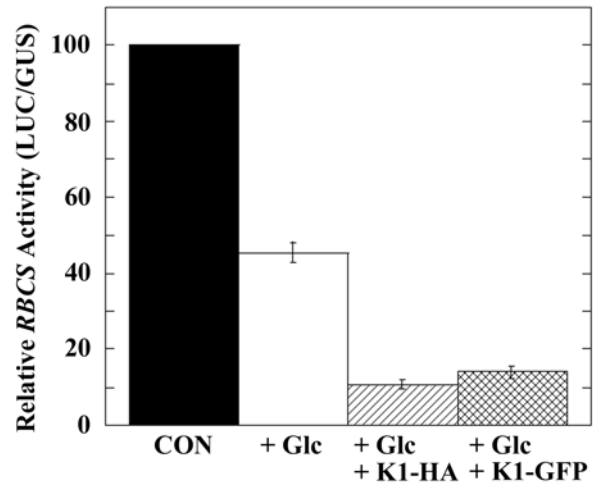

**B**

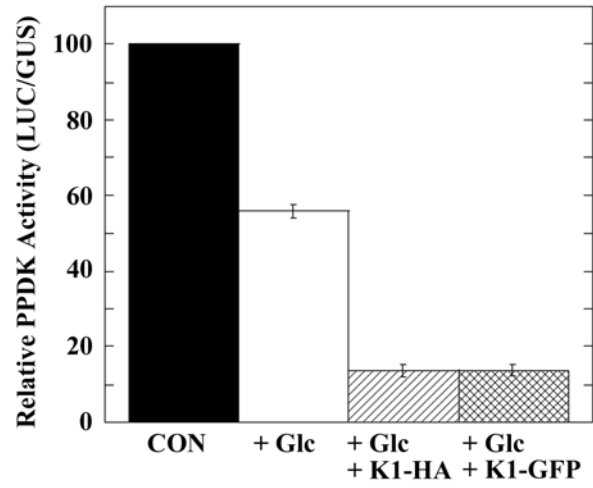

Supplement: plntphys_pp.107.108704_1.pdf [file plntphys_pp.107.108704_1.pdf]
